# Supplementary material for: Strategies That Facilitate Extraction-Free SARS-CoV-2 Nucleic Acid Amplification Tests
Source: MDPI journal article supplement (doi:10.3390/v14061311), 2022-06-15
Supplement: s1 [file s1]

# Supplementary Materials:

Supplementary Table S1. Strategies shown to facilitate the use of direct respiratory samples in NAAT of SARS-CoV-2 (extended table)

| Sample type                                                    | NAAT / detection method | Sample preparation strategies                                                                                                                                                                                  | Analytical or clinical sensitivity                                                     | Specificity                           | Reference |
|----------------------------------------------------------------|-------------------------|----------------------------------------------------------------------------------------------------------------------------------------------------------------------------------------------------------------|----------------------------------------------------------------------------------------|---------------------------------------|-----------|
| Nasopharyngeal and nasal swab in UTM                           | RT-PCR                  | 14 ul of sample input, used enzymes with high tolerability to inhibitors.<br>14 ul input into a 30 ul reaction                                                                                                 | 550 viral RNA copies/ml                                                                | Not reported                          | [7]       |
| Nasal and throat swabs suspended in nuclease free water        | RT-PCR                  | Elution in nuclease free water and increased input volume of 10ul into 25 uL reaction.                                                                                                                         | 93% overall if tested in duplicates, 100% for high to moderate viral nucleic acid load | Not assessed                          | [8]       |
| Nasopharyngeal, oropharyngeal swabs                            | RT-LAMP                 | Dry swab eluted in 0.5 mL saline and shaken vigorously for 30 minutes.<br>Higher input volume (11.5 ul input into 25 ul reaction)                                                                              | 95.6%                                                                                  | 99.4%                                 | [40]      |
| Nasopharyngeal swabs in UTM, PBS, Hanks medium, DNA/RNA shield | RT-PCR                  | Precipitation with PEG/NaCl and Heat treatment at 70°C for 30 minutes.                                                                                                                                         | 100% relative to gold standard method                                                  | 100% relative to gold standard method | [10]      |
| Heat inactivated nasopharyngeal swab-UTM eluates               | RT-PCR                  | Mixing with 3M sodium acetate, 5mg/ml linear acrylamide, followed by precipitation with 1.1 volumes of isopropanol, incubation at -20C for 30 minutes and centrifugation, ethanol addition and centrifugation. | Not reported                                                                           | Not reported                          | [11]      |
| Swab in viral transport medium                                 | RT-PCR                  | Low input volume (2ul) into 20 uL reaction                                                                                                                                                                     | 98% relative to std method                                                             | 100%                                  | [15]      |

|                                 |                                 |                                                                                                                                                                                             |                                                                                                                                                                   |              |      |
|---------------------------------|---------------------------------|---------------------------------------------------------------------------------------------------------------------------------------------------------------------------------------------|-------------------------------------------------------------------------------------------------------------------------------------------------------------------|--------------|------|
| Nasopharyngeal swab in UTM      | Fluorescence RT-LAMP            | 1 in 5 dilution of sample in water                                                                                                                                                          | 87% sensitivity with limit of detection of 54 TCID <sub>50</sub> /ml                                                                                              | 100%         | [17] |
| Nasopharyngeal swabs in UTM     | RT-PCR                          | 1 in 4 dilution of specimen in sterile RNase free water prior to the addition of the template to the mastermix                                                                              | 74.0% and 82.1% with the Allplex TM SARS-CoV-2 assay (tested with 139 NPS samples) and the Allplex TM SARS-CoV-2/FluA/FluB/RSV assay (tested with 69 NPS samples) | 100%         | [18] |
| Nasopharyngeal swabs and saliva | RT-PCR and RT-ddPCR             | Elution of swabs into Chelex-TED buffer (50% Chelex-100, TE buffer, DMSO) or addition to saliva, followed by heat treatment at 98C for 5 minutes and centrifugation to collect supernatant. | 1 copy/ul                                                                                                                                                         | Not reported | [19] |
| Sputum and nasal exudate        | Portable RT-PCR                 | 1:1 dilution with sputasol and treatment with the RNase inhibitor RNaseOUT™. Reduced template input volume to 2ul in a 20 ul reaction.                                                      | 6 RNA copies per reaction                                                                                                                                         | Not assessed | [16] |
| Saliva                          | 30 minutes Colorimetric RT-LAMP | Saliva is heat treated at 65C for 15 minutes followed by 95C for 15 minutes. Sample is then treated with Proteinase K and RNasesecure.                                                      | 85% sensitivity                                                                                                                                                   | 100%         | [22] |
| Saliva and swabs                | Colorimetric RT-LAMP            | Addition of carrier nucleic acid, RNase inhibitors, and increasing the reaction volume                                                                                                      | ~2 viral copies / ul of saliva. 97% sensitivity                                                                                                                   | 100%         | [23] |
| Saliva and Nasopharyngeal swabs | RT-PCR and RT-LAMP              | Elution of swab or mixing of saliva with RNA stabilization buffer (TCEP, EDTA, Chelex, and RNasesecure in Tris buffer) followed by 95C 15 minutes heat inactivation and cooling.            | 95%                                                                                                                                                               | 100%         | [20] |

|                                                         |                                        |                                                                                                                                                  |                                                                                                       |                                                    |      |
|---------------------------------------------------------|----------------------------------------|--------------------------------------------------------------------------------------------------------------------------------------------------|-------------------------------------------------------------------------------------------------------|----------------------------------------------------|------|
| Saliva                                                  | RT-LAMP                                | 1:1 dilution in Mucolyse (DTT), followed by dilution in 10% (w/v) chelex 100 resin and 98C heat treatment for 2 minutes                          | $1 \times 10^1$ – $1 \times 10^2$ copies/ ul                                                          |                                                    | [21] |
| Nasopharyngeal and oropharyngeal swabs eluted in saline | RT-PCR                                 | Proteinase K followed by 98C for 5 minutes                                                                                                       | 91% accuracy with standard procedure. Average increase of 5.64 Ct                                     | Not assessed                                       | [25] |
| Saliva                                                  | RT-PCR                                 | Addition of 60 ug Proteinase K followed by incubation at 37C for 5 minutes and 95C heat treatment for 5 minutes.                                 | 9441 copies/mL<br>97% sensitivity in first days of symptoms and 82% sensitivity in asymptomatic cases | 97-98%                                             | [26] |
| Nasopharyngeal swabs                                    | RT-PCR                                 | Addition of Proteinase K followed by incubation at 55C for 15 minutes and heat treatment at 98C for 5 minutes                                    | 10 RNA copies<br>90%                                                                                  | 100%                                               | [27] |
| Nasopharyngeal swabs                                    | RT-PCR                                 | Addition of 10 ul of 10 mg/ml Proteinase K followed by incubation at 55C for 15 minutes and heat treatment at 98C for 5 minutes                  | 99%                                                                                                   | 99%                                                | [28] |
| Nasopharyngeal swabs                                    | RT-PCR                                 | Proteinase K treatment (3 $\mu\text{g}/\mu\text{L}$ ) followed by incubation at 56°C for 10 minutes and heat denaturation at 98°C for 5 minutes. | 100%                                                                                                  | 100%                                               | [29] |
| Pharyngeal swab specimens in Amies medium               | Colorimetric RT-LAMP (30 min run-time) | Heating at 95°C for 5 minutes.                                                                                                                   | 86% sensitivity                                                                                       | 99.5%                                              | [30] |
| Saliva                                                  | Colorimetric RT-LAMP                   | Heat treatment 95C 10 minutes.                                                                                                                   | 100 virions/ul                                                                                        | 97% positive agreement and 100% negative agreement | [41] |

|                                                           |                             |                                                                                                                                                                                      |                                                                                                                                      |              |      |
|-----------------------------------------------------------|-----------------------------|--------------------------------------------------------------------------------------------------------------------------------------------------------------------------------------|--------------------------------------------------------------------------------------------------------------------------------------|--------------|------|
| Nasopharyngeal swabs in transport medium                  | RT-PCR                      | Heat treatment 95°C for 5 minutes.<br>1-4 ul of sample input into a final reaction volume of 20 ul.                                                                                  | ~96 % sensitivity depending on primers used and relative to Roche Cobas 6800 analyzer                                                | ~100 %       | [14] |
| Saliva or Nasopharyngeal swab eluted in saline or PBS     | 30 min Colorimetric RT-LAMP | Addition of TCEP/EDTA (2.5mM/1mM) with addition of NaOH to adjust pH) and Heat treatment 95°C for 5 minutes. RT-LAMP tolerates at least 5 ul of input material into a 25 ul reaction | 50 viral copies/ul of sample achieved 85% sensitivity relative to RT-PCR                                                             | Not reported | [24] |
| Nasopharyngeal swabs in UTM or dry swabs eluted in PBS    | RT-PCR                      | Heat treatment at 95°C for 10 minutes and 1:10 sample dilution.<br>In-house RT-PCR protocol                                                                                          | 100% sensitivity relative to gold standard method                                                                                    | 100%         | [32] |
| Saliva                                                    | RT-PCR                      | Combination of saliva with collection TBE buffer. Heat 95C 30 minutes + TBE buffer and Tween-20                                                                                      | 500-1000 viral particles/ml, comparable to std method                                                                                | 98.9%        | [33] |
| Oro- and nasopharyngeal samples in UTM or molecular water | RT-PCR                      | Heat inactivation 95C for 5 minutes                                                                                                                                                  | 100% accurate relative to std method when targeting the N gene                                                                       | Not assessed | [34] |
| Nasopharyngeal swabs eluted in M6 viral transport media   | RT-PCR                      | Heat treatment 95C for 10 minutes and lower input (3ul vs 5ul) volume                                                                                                                | 92% accuracy when compared to std method                                                                                             | Not assessed | [38] |
| Nasopharyngeal swabs in universal transport media         | RT-PCR                      | Nasopharyngeal swabs in UTM and diluted 1:4 in nuclease free water<br>65C for 10 minutes<br>8ul input into 20 ul reaction                                                            | Analytical sensitivity corresponding to $6.6 \times 10^3$ RNA copies/ml<br>95% sensitivity and 98.5% accuracy relative to std method | 99%          | [31] |
| Oropharyngeal swabs eluted in                             | RT-PCR                      | Heat treatment 98C for 5 minutes<br>5ul input into 25 ul reaction                                                                                                                    | 97.4% sensitivity, 98.3% accuracy                                                                                                    | 100%         | [35] |

|                                        |                                       |                                                                                                                                                                                                                                                                                                                 |                                                                                    |              |      |
|----------------------------------------|---------------------------------------|-----------------------------------------------------------------------------------------------------------------------------------------------------------------------------------------------------------------------------------------------------------------------------------------------------------------|------------------------------------------------------------------------------------|--------------|------|
| saline or transport solution           |                                       |                                                                                                                                                                                                                                                                                                                 |                                                                                    |              |      |
| Nasopharyngeal swabs and gargle lavage | Fluorescence and Colorimetric RT-LAMP | Swab eluates or gargle lavages (10 ml HBSS or saline) mixed with 2X Quickextract. Heat treatment at 95C for 5 minutes. dUTP and thermolabile Uracil DNA Glycosylase used to prevent carry-over contamination. Carboxylated magnetic beads to enrich RNA and increase sensitivity. 2ul input into 20 ul reaction | ~50 copies per reaction (crude sample)<br>~5 copies per reaction (bead enrichment) | 100%         | [42] |
| Nasopharyngeal swabs                   | RT-PCR                                | Thermal shock of sample at 95C for 5 minutes followed by 4C for 10 minutes.                                                                                                                                                                                                                                     | Not reported                                                                       | Not reported | [37] |

---

NAAT, nucleic acid amplification test; RT-LAMP, reverse transcription loop-mediated isothermal amplification; RT-PCR, reverse transcription polymerase chain reaction; RT-ddPCR, reverse transcription digital droplet polymerase chain reaction; Ct, cycle threshold; TCEP/EDTA, tris(2-carboxyethyl)phosphine/Ethylenediaminetetraacetic acid; DTT, dithiothreitol; UTM, universal transport media; PBS, phosphate buffered saline; TCID<sub>50</sub>/ml, Median Tissue Culture Infectious Dose/ml; TBE buffer, Tris-Borate-EDTA buffer; HBSS, Hanks' Balanced Salt Solution; dUTP, deoxyuridine triphosphate.
